# Supplementary material for: Population genetic data for ten miniSTR loci in the Sri Lankan population
Source: Springer Nature journal article supplement (doi:10.1007/s00414-016-1512-3), 2016-12-12
Supplement: MOESM2 [file 11918938]

Supplementary Table 2  *P*-value results of linkage disequilibrium of the 10 mini-STR loci for 278 unrelated Sri Lankans at a significance level p ≤ 0.05.

|  | Linkage disequilibrium | | | | | | | | | |
| --- | --- | --- | --- | --- | --- | --- | --- | --- | --- | --- |
| STR Locus | D1S1677 | D2S1776 | D10S1248 | D11S4463 | D12SATA63 | D14S1434 | D17S974 | D18S853 | D20S482 | D22S1045 |
| D1S1677 | - | 0.18366 | 0.69010 | 0.93931 | 0.07307 | 0.83564 | 0.79881 | 0.26653 | 0.58980 | 0.71010 |
| D2S1776 | 0.18366 | - | 0.92495 | 0.02475* | 0.39050 | 0.06653 | 0.81644 | 0.40168 | 0.29010 | 0.64950 |
| D10S1248 | 0.69010 | 0.92495 | - | 0.98366 | 0.31495 | 0.81317 | 0.55842 | 0.24564 | 0.32416 | 0.49337 |
| D11S4463 | 0.93931 | 0.02475* | 0.98366 | - | 0.64030 | 0.58911 | 0.17861 | 0.46366 | 0.42624 | 0.47960 |
| D12SATA63 | 0.07307 | 0.39050 | 0.31495 | 0.64030 | - | 0.52059 | 0.17634 | 0.72673 | 0.51119 | 0.07356 |
| D14S1434 | 0.83564 | 0.06653 | 0.81317 | 0.58911 | 0.52059 | - | 0.32931 | 0.27208 | 0.31634 | 0.43376 |
| D17S974 | 0.79881 | 0.81644 | 0.55842 | 0.17861 | 0.17634 | 0.32931 | - | 0.94782 | 0.28198 | 0.84960 |
| D18S853 | 0.26653 | 0.40168 | 0.24564 | 0.46366 | 0.72673 | 0.27208 | 0.94782 | - | 0.44802 | 0.58317 |
| D20S482 | 0.58980 | 0.29010 | 0.32416 | 0.42624 | 0.51119 | 0.31634 | 0.28198 | 0.44802 | - | 0.00851* |
| D22S1045 | 0.71010 | 0.64950 | 0.49337 | 0.47960 | 0.07356 | 0.43376 | 0.84960 | 0.58317 | 0.00851* | - |
| * Significant linkage disequilibrium observed amongst pairs of mini-STR loci observed prior to Bonferron’s correction. | | | | | | | | | | |
